# Supplementary material for: Ultrasound-Assisted Extraction Optimization of Proanthocyanidins from Kiwi (Actinidia chinensis) Leaves and Evaluation of Its Antioxidant Activity
Source: MDPI journal article supplement (doi:10.3390/antiox10081317), 2021-08-21
Supplement: s1 [file s1]

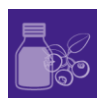

## Supplementary material

**Table S1.** Extracted compositions identified peaks area by HPLC-QTOF-MS/MS.

| Time (min) | Formula                                         | Mass ( <i>m/z</i> ) | Compound Identification     | MS/MS Fragment ( <i>m/z</i> ) | UAE       | ME    |
|------------|-------------------------------------------------|---------------------|-----------------------------|-------------------------------|-----------|-------|
|            |                                                 |                     |                             |                               | Peak Area |       |
| 18.36      | C <sub>20</sub> H <sub>22</sub> O <sub>5</sub>  | 341                 | caffeyl glucopyranose       | 326; 319; 253; 225            | 0.110     | 0.097 |
| 21.47      | C <sub>13</sub> H <sub>14</sub> O <sub>8</sub>  | 297                 | benzoyl glucuronide         | 179; 135; 297                 | 0.223     | 0.103 |
| 22.33      | C <sub>30</sub> H <sub>26</sub> O <sub>13</sub> | 593                 | dimer propelargonidins      | 441; 467; 425                 | 0.105     | 0.068 |
| 23.31      | C <sub>21</sub> H <sub>22</sub> O <sub>12</sub> | 465                 | taxifolin hexoside          | 285; 179; 301                 | 0.059     | 0.039 |
| 24.72      | C <sub>15</sub> H <sub>14</sub> O <sub>6</sub>  | 289                 | catechin                    | 289; 181; 137; 125; 151       | 0.273     | 0.120 |
| 27.91      | C <sub>30</sub> H <sub>26</sub> O <sub>12</sub> | 577                 | dimer procyanidin           | 577; 449; 425; 289; 287       | 0.434     | 0.359 |
| 28.95      | C <sub>30</sub> H <sub>26</sub> O <sub>12</sub> | 577                 | dimer procyanidin isomer    | 577; 449; 425; 289; 287       | 1.154     | 0.953 |
| 30.39      | C <sub>20</sub> H <sub>18</sub> O <sub>11</sub> | 433                 | quercetin 3-O-xyloside      | 325; 300; 285; 151            | 0.062     | -     |
| 31.54      | C <sub>15</sub> H <sub>14</sub> O <sub>6</sub>  | 289                 | epicatechin                 | 289; 181; 137; 125; 151       | 0.865     | 0.651 |
| 35.01      | C <sub>45</sub> H <sub>38</sub> O <sub>18</sub> | 865                 | trimer procyanidin          | 577; 451; 407; 289            | 0.956     | 0.874 |
| 37.24      | C <sub>60</sub> H <sub>50</sub> O <sub>24</sub> | 1153                | tetramer procyanidin        | 865; 577; 451; 289            | 0.769     | 0.693 |
| 39.24      | C <sub>60</sub> H <sub>50</sub> O <sub>24</sub> | 1153                | tetramer procyanidin isomer | 865; 577; 451; 289            | 1.077     | 0.742 |
| 41.33      | C <sub>27</sub> H <sub>30</sub> O <sub>16</sub> | 610                 | rutin                       | 301                           | 0.377     | 0.327 |
| 45.56      | C <sub>21</sub> H <sub>20</sub> O <sub>12</sub> | 463                 | isoquercetin                | 301; 287; 151                 | 0.781     | 0.459 |
| 51.51      | C <sub>21</sub> H <sub>20</sub> O <sub>11</sub> | 447                 | quercetin                   | 301; 271; 243; 179            | 2.381     | 2.040 |
| 54.74      | C <sub>15</sub> H <sub>14</sub> O <sub>5</sub>  | 273                 | afzelechin                  | 273; 147; 138; 126            | 0.039     | 0.024 |
| 58.05      | C <sub>20</sub> H <sub>18</sub> O <sub>11</sub> | 433                 | quercetin-3-arabinoside     | 300; 179                      | 0.161     | 0.122 |
